# Supplementary material for: Hepatitis C reference viruses highlight potent antibody responses and diverse viral functional interactions with neutralising antibodies
Source: HighWire-hosted journal article supplement (doi:10.1136/gutjnl-2020-321190), 2020-12-15

Figure S2

A

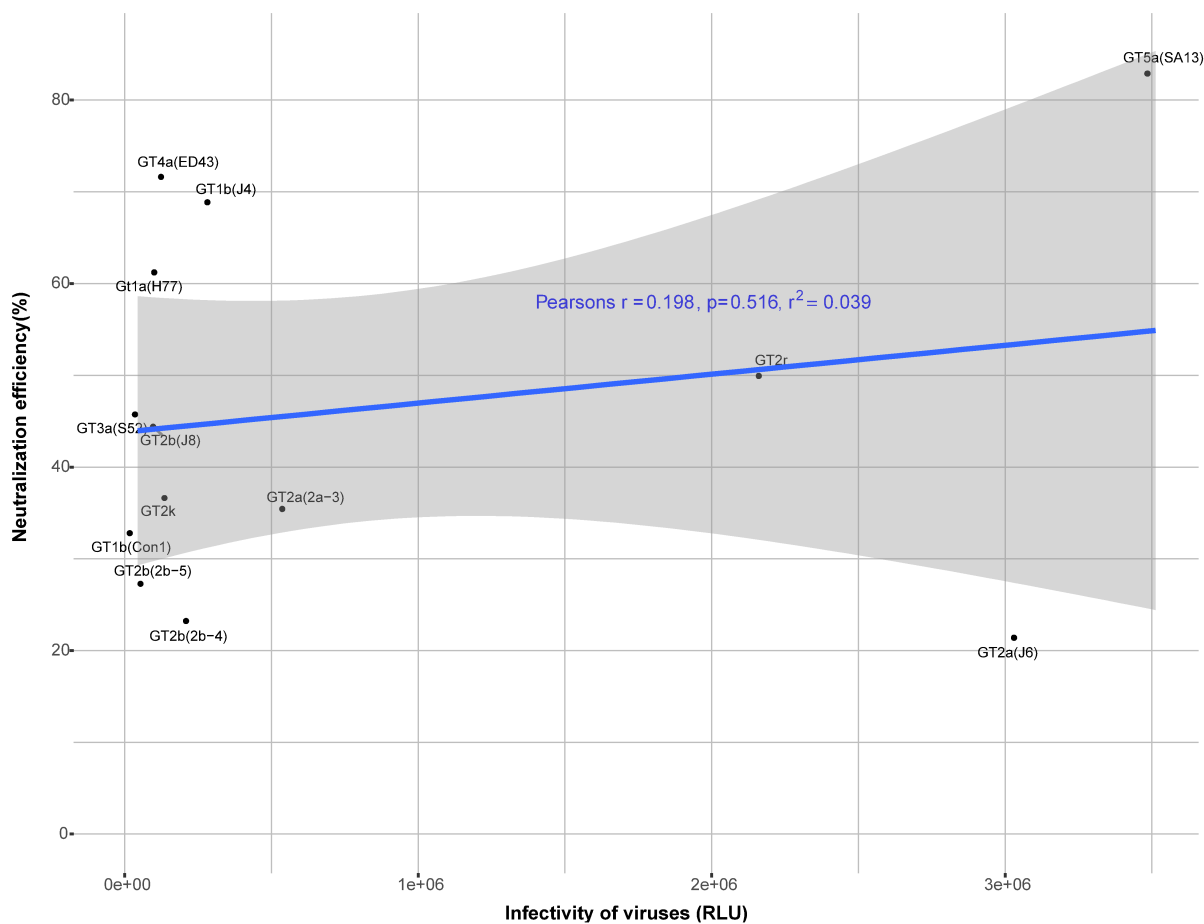

B

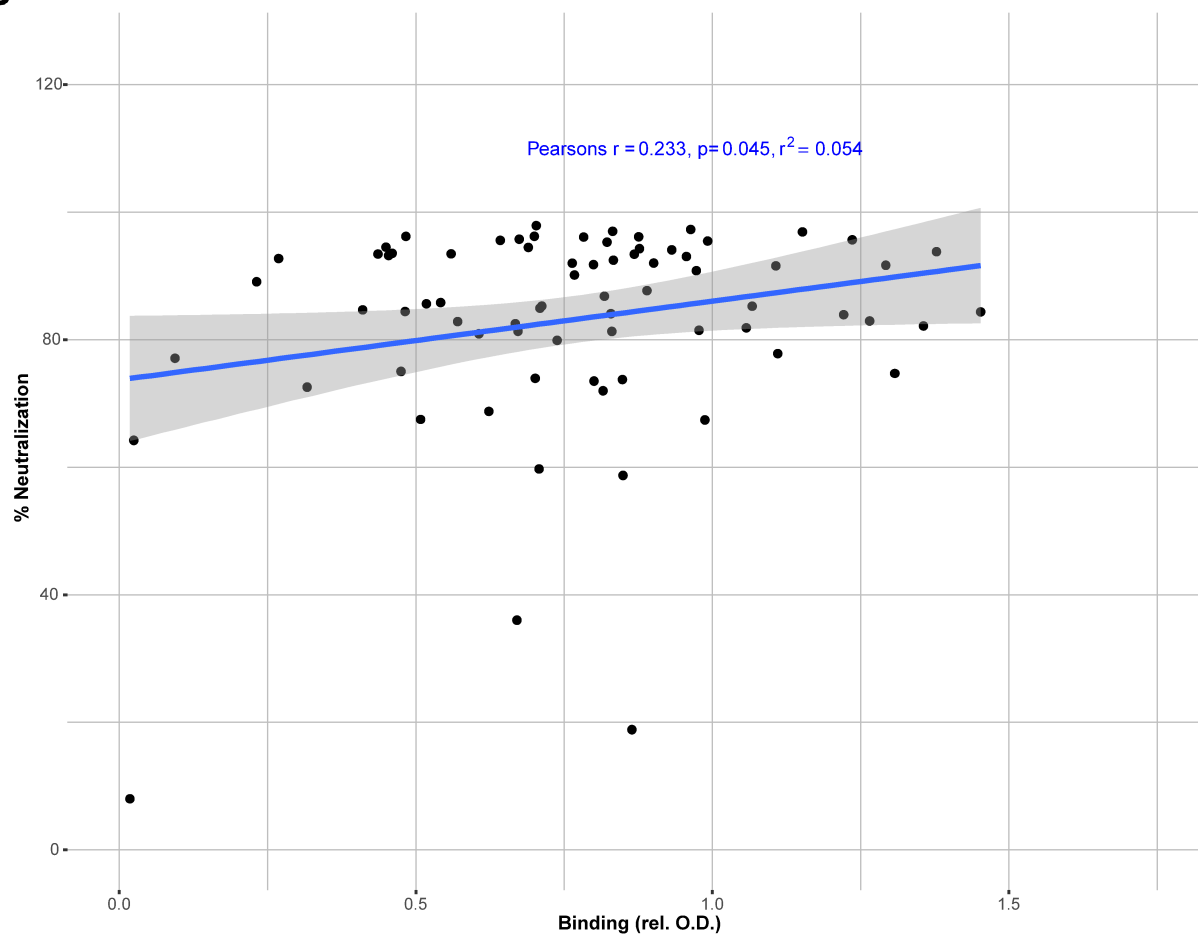

Supplement: gutjnl-2020-321190supp003_data_supplement.pdf [file gutjnl-2020-321190supp003_data_supplement.pdf]
