# Supplementary figures and images for: Hepatitis C reference viruses highlight potent antibody responses and diverse viral functional interactions with neutralising antibodies
Source: PubMed Central journal article supplement — Gut. 2020 Dec 15;70(9):1734–45. doi: 10.1136/gutjnl-2020-321190 (PMC8355883; doi:10.1136/gutjnl-2020-321190), 2020-12-15

**A** Correlation (average neutralization) Figure S3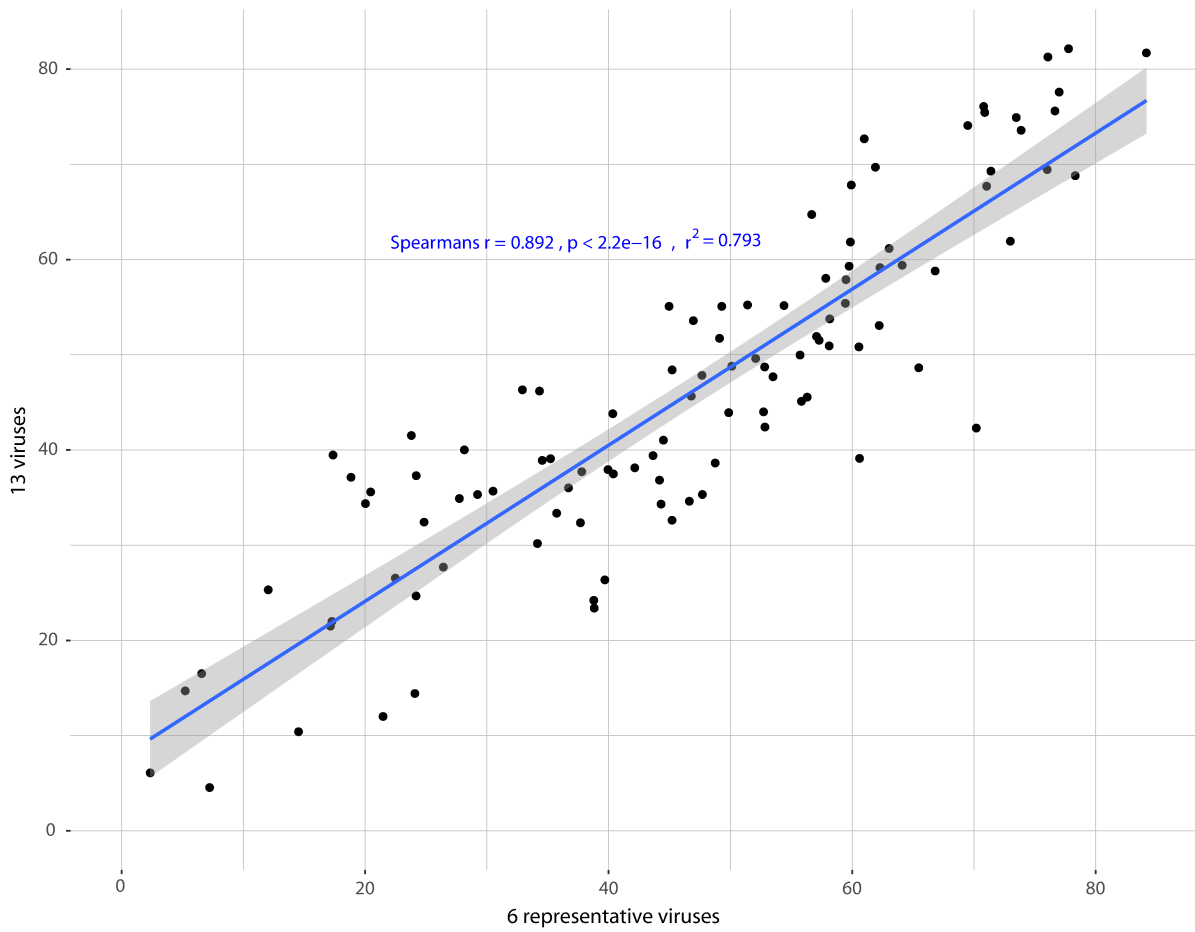**B** Correlation (CNI)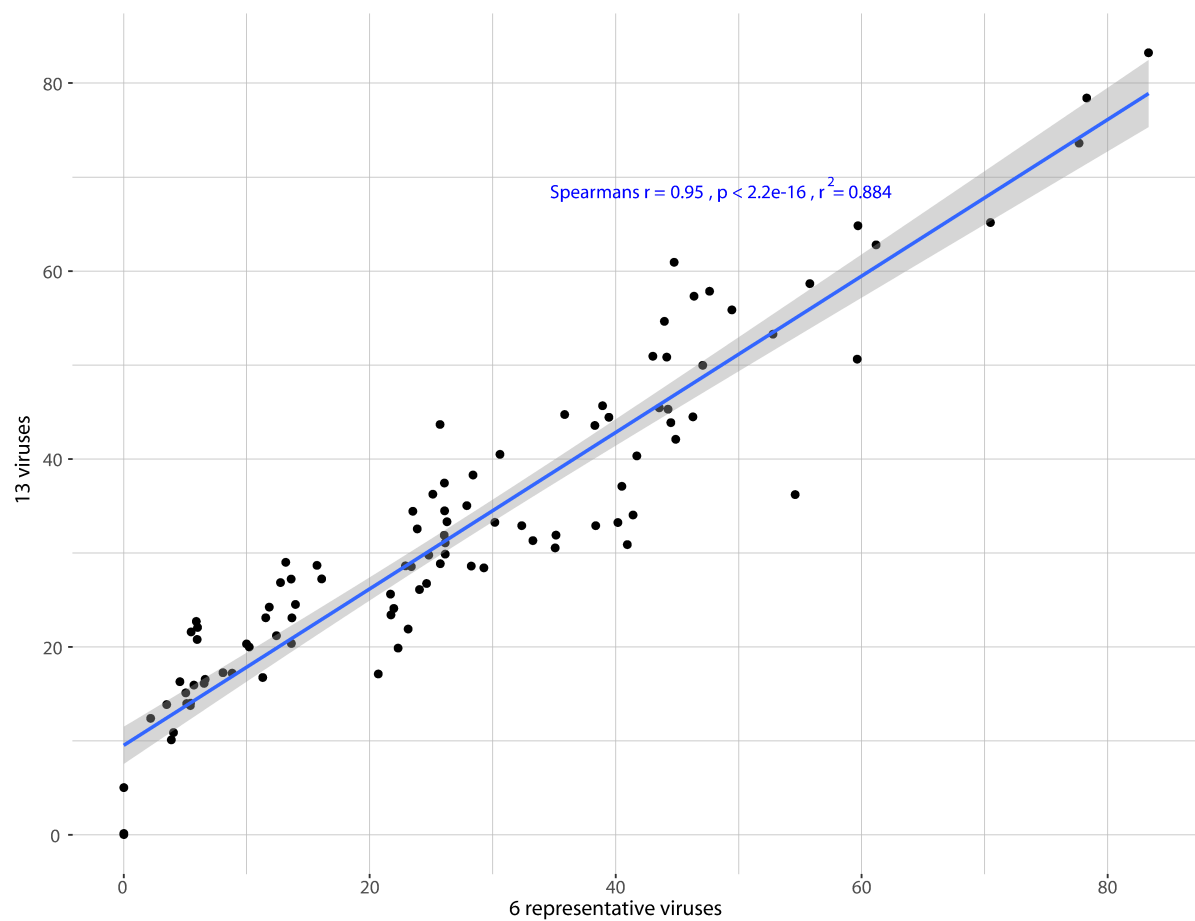

Supplement: gutjnl-2020-321190supp004.pdf [file gutjnl-2020-321190supp004.pdf]
