# Supplementary figures and images for: Hepatitis C reference viruses highlight potent antibody responses and diverse viral functional interactions with neutralising antibodies
Source: HighWire-hosted journal article supplement (doi:10.1136/gutjnl-2020-321190), 2020-12-15

Figure S7

**A**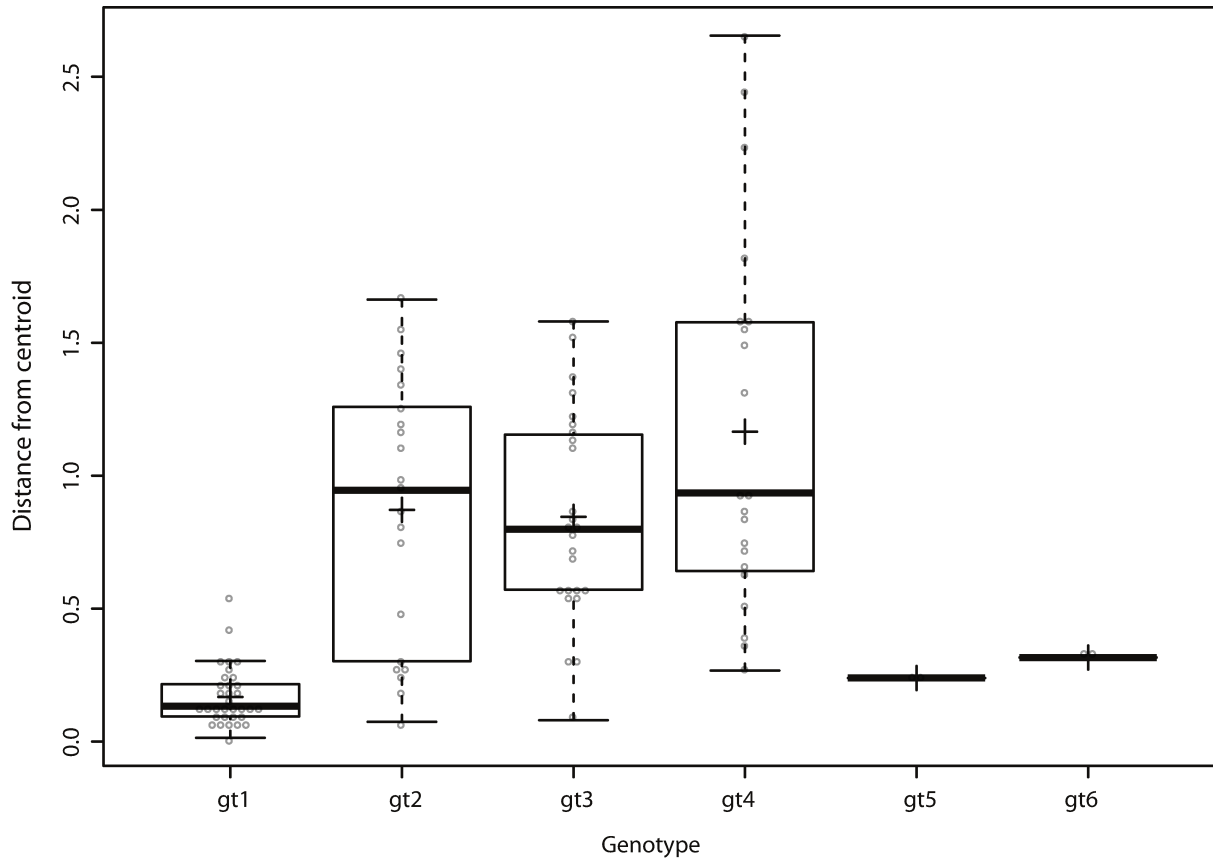**B**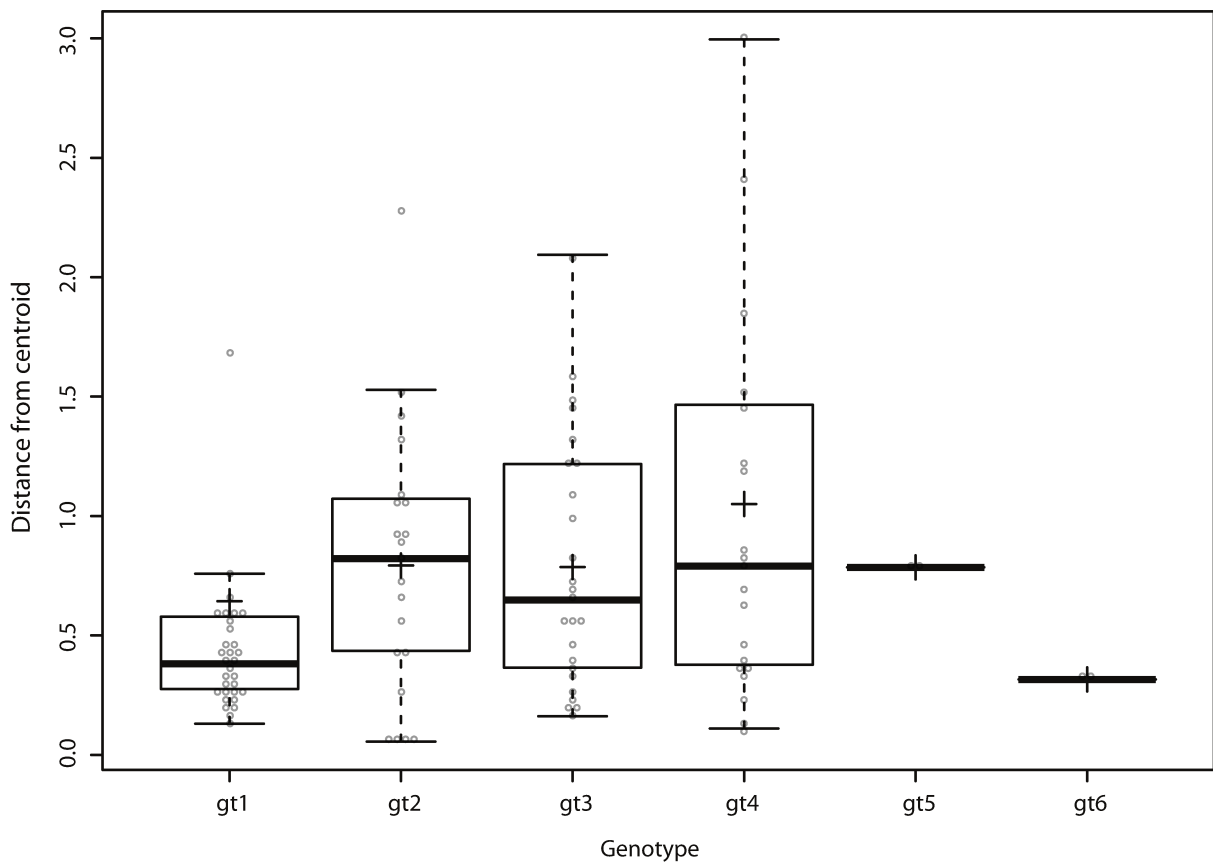

Supplement: gutjnl-2020-321190supp008_data_supplement.pdf [file gutjnl-2020-321190supp008_data_supplement.pdf]

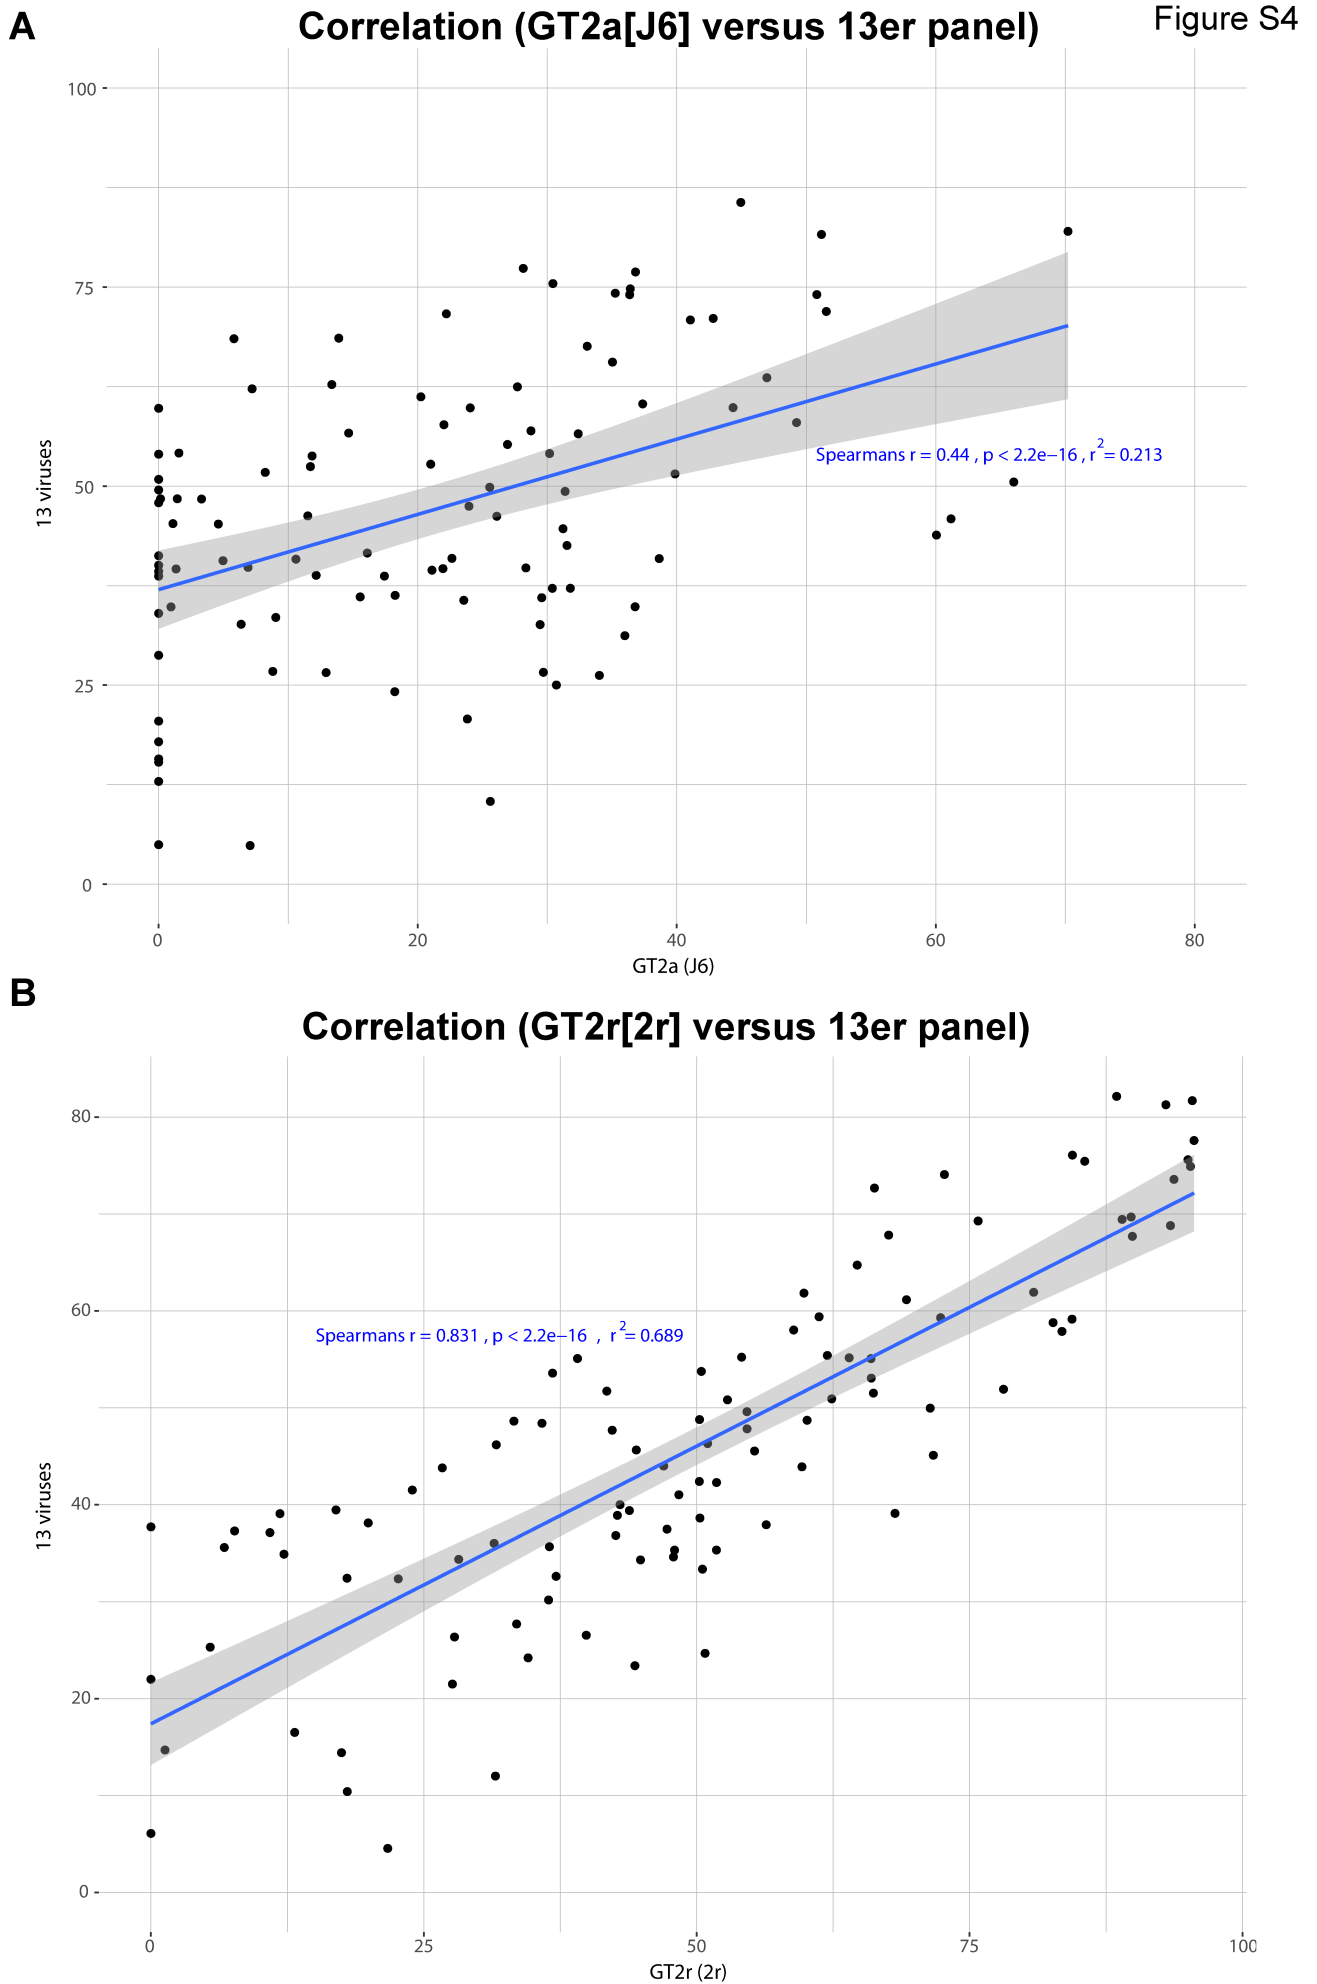

Supplement: gutjnl-2020-321190supp005_data_supplement.pdf [file gutjnl-2020-321190supp005_data_supplement.pdf]
